# Supplementary material
Source: PubMed Central journal article supplement (PMC3173229)
Supplement: supp_M111.249003_jbc.M111.249003-1.pdf [file supp_M111.249003_jbc.M111.249003-1.pdf]

**Table 1S Primers used for Real-time PCR**

| <b>Name</b>         | <b>Primer Sequence</b>     |
|---------------------|----------------------------|
| CUL4B Forward       | TGGAAGTTCATTTACCACCAGAGATG |
| CUL4B Reverse       | TTCTGCTTTTAAACACACAGTGCCTA |
| PrxIII Forward      | GAAGTTGTCGCAGTCTCAGTG      |
| PrxIII Reverse      | TCTCGGGAAATCTGCTTAGTT      |
| CUL4A Forward       | GGAAAGCACAGTGGTCGAA        |
| CUL4A Reverse       | GGGACACCTGGAATTCCTTC       |
| DDB1 Forward        | ATGACGATGGCAGCGGTATG       |
| DDB1 Reverse        | CAAGAAGACGATGGTGGAGAGG     |
| Roc1 (Rbx1) Forward | GAACCACATTATGGATCTTTGC     |
| Roc1 (Rbx1) Reverse | CTCTGTTGTCCAATGGACAC       |
| GAPDH Forward       | CCAGGTGGTCTCCTCTGACTT      |
| GAPDH Reverse       | GTTGCTGTAGCCAAATTCGTTGT    |

**TABLE 2S Classification of known proteins**

| <b>Category</b>          | <b>Protein (gene) symbol</b>                                                                                                                                                                                                           |
|--------------------------|----------------------------------------------------------------------------------------------------------------------------------------------------------------------------------------------------------------------------------------|
| Oxidative stress         | Superoxide dismutase 1, soluble;<br>Peroxiredoxin 3                                                                                                                                                                                    |
| Energy metabolism        | Triosephosphate isomerase 1;<br>Glyoxalase I;<br>NADH dehydrogenase (ubiquinone)1 beta subcomplex                                                                                                                                      |
| Transcription modulators | Eukaryotic translation initiation factor 3, subunit 2 beta;<br>Eukaryotic translation initiation factor 5A;<br>Heterogeneous nuclear ribonucleoprotein K isoform b;<br>Aspartyl-tRNA synthetase                                        |
| Signaling pathway        | Heat shock 70kDa protein 9B precursor;<br>Heat shock 27kDa protein 3;<br>Heat shock 70kDa protein 5 (glucose-regulated protein,78kDa ) ;<br>Sulfotransferase family, member 1                                                          |
| Cytoskeleton             | Tropomyosin 3 isoform 2;<br>Annexin A5                                                                                                                                                                                                 |
| Other categories         | Cyclin H;<br>Non-metastatic cells 1, protein (NM23A) expressed in isoform b;<br>Tripartite motif-containing 47;<br>Proteasome alpha 1 subunit isoform 2;<br>ATP binding protein associated with cell differentiation;<br>2B28 protein; |

**TABLE 3S Classification of known proteins**

| <b>Category</b>                   | <b>Protein (gene) symbol</b>                                      |
|-----------------------------------|-------------------------------------------------------------------|
| Oxidative stress                  | Peroxiredoxin 3                                                   |
| DNA replication and recombination | RuvB-like 1                                                       |
| Transcription modulators          | Eukaryotic translation initiation factor 3, subunit 2 beta ,36kDa |
| Signaling pathway                 | Homeobox prox1;                                                   |
|                                   | Chaperonin containing TCP1, subunit 6A isoform a                  |
| Cytoskeleton                      | F-actin capping protein alpha-1 subunit                           |
| Other categories                  | Proteasome alpha 1 subunit isoform                                |
|                                   | Ras-GTPase-activating protein SH3-domain-binding protein          |
|                                   | Endoplasmic reticulum protein 29 isoform 1 precursor              |
